# Supplementary material for: Prevalence and associated factors of probable neuropathic pain among adults with type 2 diabetes in Turkish primary care: a cross-sectional study
Source: Research Square preprint supplement (doi:10.21203/rs.3.rs-8561163/v1), 2026-02-03
Supplement: Supplementary file 1 [file bd2147a7092533f46be0b654.docx]

**Study questionnaire (English version)**

**Study title:** Prevalence and associated factors of probable neuropathic pain among adults with type 2 diabetes in Turkish primary care: a cross-sectional study

**Administration:** Face-to-face interview conducted by a trained researcher.
**Instructions:** Please answer the following questions. Mark one option unless otherwise stated.

**Section A. Sociodemographic characteristics**

1. **Age (years):** ____
2. **Sex:** ☐ Female ☐ Male
3. **Marital status:** ☐ Single ☐ Married ☐ Widowed/Divorced
4. **Highest educational level completed:**
   ☐ Primary school or less
   ☐ Secondary/High school
   ☐ University or higher
5. **Employment status:** ☐ Working ☐ Not working

**Section B. Clinical characteristics**

1. **Duration of type 2 diabetes:** ____ years (or ____ months)
2. **Smoking status:** ☐ Current smoker ☐ Never smoker
3. **Alcohol use:** ☐ Yes ☐ No
4. **Comorbid conditions (physician-diagnosed):**
   Do you have any comorbid condition(s)? ☐ Yes ☐ No
   If **Yes**, please indicate which (you may mark more than one):
   ☐ Hypertension
   ☐ Heart failure
   ☐ Psychiatric disorder
   ☐ History of stroke
